# Supplementary material
Source: publisher site journal article supplement (https://neobiota.pensoft.net/article/82636/download/suppl/34/)
Supplement: Supplementary file 1

# **Plankton hitch-hikers on naturalist's instruments as silent intruders of aquatic ecosystems: current risks and possible prevention**

Łukasz Wejnerowski <sup>1</sup>, Tümer Orhun Aykut <sup>2</sup>, Aleksandra Pełechata <sup>1</sup>, Michał Rybak <sup>3</sup>, Tamara Dulić <sup>4</sup>, Jussi Meriluoto <sup>4</sup>, Marcin Krzysztof Dziuba <sup>5</sup>

<sup>1</sup> *Department of Hydrobiology, Institute of Environmental Biology, Faculty of Biology, Adam Mickiewicz University, Poznań, Poland* <sup>2</sup> *Department of Biology, Institute of Science, Istanbul University, Istanbul, Turkey* <sup>3</sup> *Department of Water Protection, Institute of Environmental Biology, Faculty of Biology, Adam Mickiewicz University, Poznań, Poland* <sup>4</sup> *Biochemistry, Faculty of Science and Engineering, Åbo Akademi University, Turku, Finland* <sup>5</sup> *Department of Ecology and Evolutionary Biology, University of Michigan, Ann Arbor, USA*

Corresponding author: Łukasz Wejnerowski ([wejner@amu.edu.pl](mailto:wejner@amu.edu.pl))

## **Supplementary Material 4**

**The list of questions and possible responses in the survey**

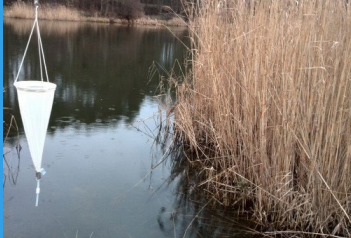

# Plankton Sampling Question Survey

## 1 | Do you use or have you ever used a plankton net towing for sampling plankton during fieldwork?

- Yes
- No

## 2 | How often do/did you sample plankton from waterbodies using a plankton net?

- Regularly; usually up to ten times a year
- Regularly; usually from eleven to twenty times a year
- Regularly; usually more than twenty times a year
- Irregularly; there were years I did not collect plankton samples with a plankton net
- Irregularly, there are years when I sample plankton up to ten times a year, and other years when I do it more often
- None of the above

## 3 | How many water bodies (e.g. lakes, reservoirs, ponds) do/did you sample for plankton using plankton net per day?

- Usually more than one, but not more than five waterbodies per day
- Usually one per day, rarely more than one
- Always one per day
- Usually more than five different water bodies per day

## 4 | What do/did you do with the plankton net after sampling?

- I always immerse/have -immersed (several times) an opened plankton net in the water body
- I always immerse/have -immersed (several times) an open plankton net in the waterbody and let it dry
- I always rinse/have -rinsed an open plankton net with distilled water/tap water and let it dry
- I always just leave the plankton net to dry
- I always rinse/have -rinsed an open plankton net with detergent or other liquid to sterilize plankton net
- None of the above\*

## 5 | Do/Did you use different nets for each sampled lake, when you sample/sampled more than one on the same day?

- Yes
- No
- I do/did not sample more than one lake on the same day

## 6 | What is your profession?

- Conservation biologist/Hydrobiologist at university/academy/institute
- Employee at water quality monitoring service
- None of the above\*\*

## 7 | What is your degree status?

- Student
- Bachelor's degree
- Master's degree
- PhD student
- PhD
- Professor

## 8 | What is your nationality?

.....

*Respondents that chose the answer „Non of the above“ in the case of the question 4 and 6 were additionally asked to specify what they do/did with the net after sampling (\*) or what is/was their profesion (\*\*).*
